# Supplementary material for: Cytological and Transcript Analyses Reveal Fat and Lazy Persister-Like Bacilli in Tuberculous Sputum
Source: PLOS journal article supplement (doi:10.1371/journal.pmed.0050075), 2008-03-26
Supplement: S2 (10.1371/journal.pmed.0050075.s002) [file journal.pmed.0050075.s002]

**Table S2** **Comparison of functional classifications [2]** **and published gene lists with genes identified to be significantly expressed in sputum sample 1vs. aerobic growth of cognate isolate**

| **Subset of genes enriched** | **No. genes** | **Hypergeometric**  **p value1** |
| --- | --- | --- |
| Activation Specific_Murine Macrophage Schnappinger *et al.,* 2003 [3] | 7 | 5.84E-08 |
| dosR Regulon Park *et* al., 2003 [4] | 6 | 2.35E-07 |
| dosR-dependent genes induced in vitro Kendall *et* al., 2004 [5] | 6 | 2.98E-07 |
| RNI Induced genes Ohno et al., 2003 [6] | 5 | 1.28E-06 |
| NRP or Stationary phase Induced genes Voskuil *et* al., 2004 [7] | 7 | 2.36E-06 |
| Low Oxygen Induced Bacon *et* al., 2004 [8] | 6 | 3.17E-06 |
| Slow Growth Induced >1.6 fold_BCG Beste *et al*., 2007 [9] | 5 | 3.38E-05 |
| Intracellular_Murine Macrophage Induced Schnappinger *et al.,* 2003 [3] | 10 | 9.51E-05 |
| Nutrient Starvation Repressed 4 or 24 or 96 h Betts *et al*., 2002 [10] | 10 | 0.000117 |
| Nutrient Starvation Repressed 4 h Betts *et al*., 2002 [10] | 7 | 0.000119 |
| II.A Synthesis and modification of macromolecules | 7 | 0.000134 |
| 2.5 fold induced NRP1 v Aerobic ANOVA p0.05 B+H | 4 | 0.00021 |
| Slow Growth Induced >2 fold_BCG Beste *et al*., 2007 [9] | 3 | 0.000265 |
| Nutrient Starvation Repressed 96 h Betts *et al*., 2002 [10] | 8 | 0.000272 |
| Slow Growth Induced >1.2 fold_BCG Beste *et al.*, 2007 [9] | 6 | 0.000308 |
| sigD regulon Calamita *et al*., 2005 [11] | 4 | 0.000316 |
| Murine hollow fibre model Induced v log phase H37Rv Karakousis *et al*., 2004 [12] | 7 | 0.00038 |
| II.A.7 RNA synthesis, RNA modification and DNA transcription | 3 | 0.000716 |
| sigE repressed genes in sigE KO v WT H37Rv Manganelli *et al*., 2001 [13] | 3 | 0.00119 |
| II.A.6 Protein translation and modification | 2 | 0.0031 |
| Genes required for mycobacterial growth in vitro Sassetti *et al*., 2003 [14] | 9 | 0.00472 |
| Nutrient Starvation Repressed 24 h Betts *et al*., 2002 [10] | 6 | 0.00562 |
| 2.5 fold induced 70:30 v Aerobic ANOVA p0.05 B+H | 2 | 0.00789 |
| d BALBc vs 7H9 broth at 45 days Repressed Talaat *et al*. 2007 [15] | 4 | 0.00808 |
| 2.5 fold induced Sputum v Aerobic ANOVA p0.05 B+H | 4 | 0.018 |

1A cut-off of p<0.05 was applied.

**REFERENCES**

2. Cole ST, *et al*. (1998) Deciphering the biology of *Mycobacterium tuberculosis* from the complete genome sequence*.* Nature, 393: 537-544.

3. Schnappinger D, *et al*. (2003) Transcriptional adaptation of *Mycobacterium tuberculosis* within macrophages: Insights into the phagosomal environment. J Exp Med 198: 693-704.

4. Park HD, *et al.* (2003) Rv3133c/dosR is a transcription factor that mediates the hypoxic response of *Mycobacterium tuberculosis.* Mol Microbiol 48: 833-843.

5. Kendall SL, *et al.* (2004) The *Mycobacterium tuberculosis* dosRS two-component system is induced by multiple stresses. Tuberculosis 84: 247-255.

6. Ohno H, *et al*. (2003) The effects of reactive nitrogen intermediates on gene expression in *Mycobacterium tuberculosis*. Cell Microbiol 5: 637-648.

7. Voskuil MI, Visconti KC , Schoolnik GK (2004) *Mycobacterium tuberculosis* gene expression during adaptation to stationary phase and low-oxygen dormancy. Tuberculosis 84: 218-227.

8. Bacon J, *et al.* (2004) The influence of reduced oxygen availability on pathogenicity and gene expression in *Mycobacterium tuberculosis*. Tuberculosis 84: 205-217.

9. Beste DJ, *et al.* (2007) Transcriptomic analysis identifies growth rate modulation as a component of the adaptation of mycobacteria to survival inside the macrophage. J Bacteriol 189: 3969-3976

10. Betts JC, Lukey PT, Robb LC, McAdam RA, Duncan K (2002)

Evaluation of a nutrient starvation model of *Mycobacterium tuberculosis* persistence by gene and protein expression profiling. Mol Microbiol, 43: 717-731.

11. Calamita H, *et al*. (2005) The *Mycobacterium tuberculosis* SigD sigma factor controls the expression of ribosome-associated gene products in stationary phase and is required for full virulence. Cell Microbiol 7: 233-244.

12. Karakousis PC, *et al*. (2004) Dormancy phenotype displayed by extracellular *Mycobacterium tuberculosis* within artificial granulomas in mice*.* J Exp Med 200: 647-657.

13. Manganelli R, Voskuil MI, Schoolnik GK, Smith, I (2001)

The Mycobacterium tuberculosis ECF sigma factor sigmaE: role in global gene expression and survival in macrophages. Mol Microbiol 41: 423-437.

14. Sassetti CM, Boyd DH, Rubin EJ (2003) Genes required for mycobacterial growth defined by high density mutagenesis. Mol Microbiol 48: 77-84.

15. Talaat AM, *et al.* (2007) Mycobacterial bacilli are metabolically active during chronic tuberculosis in murine lungs: Insights from genome-wide transcriptional profiling. J Bacteriol 189: 4265-4284..
