# Supplementary material for: Cytological and Transcript Analyses Reveal Fat and Lazy Persister-Like Bacilli in Tuberculous Sputum
Source: PLOS journal article supplement (doi:10.1371/journal.pmed.0050075), 2008-03-26
Supplement: S6 (10.1371/journal.pmed.0050075.s006) [file journal.pmed.0050075.s006]

**TABLE S6 Hypergeometric probability analysis of genes determined to be >2.5-fold downregulated in sputum compared to *in vitro* H37Rvgrowth by amplified microarray**

| **Subset of genes enriched** | **No. genes** | **Hypergeometric**  **p value1** |
| --- | --- | --- |
| 2.5 fold repressed NRP2 v Aerobic ANOVA p0.05 B+H This study | 56 | 3.80E-36 |
| Intracellular_Murine Macrophage Repressed Schnappinger *et al.*, 2003 [3] | 64 | 8.16E-35 |
| Slow Growth Repressed >1.2 fold_BCG Beste *et al.*, 2007 [9] | 50 | 8.75E-20 |
| Nutrient Starvation Repressed 4 or 24 or 96 h Betts *et al.*, 2002 [10] | 81 | 4.61E-14 |
| Murine hollow fibre model Repressed v log phase H37Rv Karakousis *et al.*, 2004 [12] | 21 | 1.40E-11 |
| sigE repressed genes in sigE KO v WT H37Rv Manganelli *et al*., 2001 [13] | 18 | 3.57E-11 |
| II.A.1 Ribosomal protein synthesis and modification [2] | 21 | 3.96E-10 |
| I.B.6.a Aerobic [2] | 14 | 7.47E-09 |
| PhoP regulon genes induced in WT v mutant Walters *et al.*, 2006 [17] | 16 | 4.84E-08 |
| sigD regulon Calamita *et al*., 2005 [11] | 18 | 2.08E-07 |
| 2.5 fold repressed NRP1 v Aerobic ANOVA p0.05 B+H This study | 7 | 4.24E-07 |
| Stationary Phase Low Glu Induced genes Hampshire et al., 2004 [18] | 40 | 5.57E-07 |
| I.B.6 Respiration [2] | 17 | 1.13E-06 |
| I.B.8 ATP-proton motive force [2] | 6 | 4.44E-06 |
| sigD Repressed knockout v WT H37Rv Raman *et al.*, 2004 [22] | 14 | 5.33E-06 |
| Genes required for mycobacterial growth in vitro Sassetti *et al*., 2003 [14] | 75 | 7.25E-06 |
| II.A Synthesis and modification of macromolecules [2] | 34 | 2.20E-05 |
| I.B Energy metabolism [2] | 42 | 2.53E-05 |
| Nutrient Starvation Induced 4 or 24 or 96 h Betts *et al*., 2002 [10] | 55 | 8.30E-05 |
| 1 Small molecule metabolism [2] | 102 | 0.00342 |
| II.A.6 Protein translation and modification [2] | 5 | 0.00385 |
| I.F Purines, pyrimidines, nucleosides and nucleotides [2] | 11 | 0.0047 |
| Genes Required for Survival in Macrophages. Rengarajan *et al*., 2005 [23] | 18 | 0.00611 |
| I.B.1 Glycolysis [2] | 4 | 0.00982 |
| I.H.2 Modification of fatty and mycolic acids [2] | 4 | 0.0176 |
| IV.A Virulence [2] | 7 | 0.0219 |
| BALBc vs 7H9 broth at 45 days Repressed Talaat *et al.*, 2007 [15] | 18 | 0.0228 |
| I.H Lipid biosynthesis [2] | 10 | 0.0229 |
| I.H.1 Synthesis of fatty and mycolic acids [2] | 5 | 0.0424 |
| dosR-dependent genes repressed in vitro Kendall *et al.*, 2004 [5] | 4 | 0.0505 |
| I.F.1 Purine ribonucleotide biosynthesis [2] | 4 | 0.0595 |

1A cut-off of p<0.05 was applied.

**REFERENCES**

2. Cole ST, *et al*. (1998) Deciphering the biology of *Mycobacterium tuberculosis* from the complete genome sequence*.* Nature, 393: 537-544.

3. Schnappinger D, *et al*. (2003) Transcriptional adaptation of *Mycobacterium tuberculosis* within macrophages: Insights into the phagosomal environment. J Exp Med 198: 693-704.

4. Park HD, *et al.* (2003) Rv3133c/dosR is a transcription factor that mediates the hypoxic response of *Mycobacterium tuberculosis.* Mol Microbiol 48: 833-843.

5. Kendall SL, *et al.* (2004) The *Mycobacterium tuberculosis* dosRS two-component system is induced by multiple stresses. Tuberculosis 84: 247-255.

6. Ohno H, *et al*. (2003) The effects of reactive nitrogen intermediates on gene expression in *Mycobacterium tuberculosis*. Cell Microbiol 5: 637-648.

7. Voskuil MI, Visconti KC , Schoolnik GK (2004) *Mycobacterium tuberculosis* gene expression during adaptation to stationary phase and low-oxygen dormancy. Tuberculosis 84: 218-227.

8. Bacon J, *et al.* (2004) The influence of reduced oxygen availability on pathogenicity and gene expression in *Mycobacterium tuberculosis*. Tuberculosis 84: 205-217.

9. Beste DJ, *et al.* (2007) Transcriptomic analysis identifies growth rate modulation as a component of the adaptation of mycobacteria to survival inside the macrophage. J Bacteriol 189: 3969-3976

10. Betts JC, Lukey PT, Robb LC, McAdam RA, Duncan K (2002)

Evaluation of a nutrient starvation model of *Mycobacterium tuberculosis* persistence by gene and protein expression profiling. Mol Microbiol, 43: 717-731.

11. Calamita H, *et al*. (2005) The *Mycobacterium tuberculosis* SigD sigma factor controls the expression of ribosome-associated gene products in stationary phase and is required for full virulence. Cell Microbiol 7: 233-244.

12. Karakousis PC, *et al*. (2004) Dormancy phenotype displayed by extracellular *Mycobacterium tuberculosis* within artificial granulomas in mice*.* J Exp Med 200: 647-657.

13. Manganelli R, Voskuil MI, Schoolnik GK, Smith, I (2001)

The Mycobacterium tuberculosis ECF sigma factor sigmaE: role in global gene expression and survival in macrophages. Mol Microbiol 41: 423-437.

14. Sassetti CM, Boyd DH, Rubin EJ (2003) Genes required for mycobacterial growth defined by high density mutagenesis. Mol Microbiol 48: 77-84.

15. Talaat AM, *et al.* (2007) Mycobacterial bacilli are metabolically active during chronic tuberculosis in murine lungs: Insights from genome-wide transcriptional profiling. J Bacteriol 189: 4265-4284..

16. Fisher MA, Plikaytis BB, Shinnick TM (2002) Microarray analysis of the *Mycobacterium tuberculosis* transcriptional response to the acidic conditions found in phagosomes. J Bacteriol 184: 4025-4032.

17. Walters SB, *et al*. (2006) The *Mycobacterium tuberculosis* PhoPR two-component system regulates genes essential for virulence and complex lipid biosynthesis. Mol Microbiol 60: 312-330.

18. Hampshire T, *et al*. (2004) Stationary phase gene expression of *Mycobacterium tuberculosis* following a progressive nutrient depletion: a model for persistent organisms? Tuberculosis 84: 228-238.

19. Sun R, *et al*. (2004) *Mycobacterium tuberculosis* ECF sigma factor sigC is required for lethality in mice and for the conditional expression of a defined gene set. Mol Microbiol. **52**: 25-38.

20. Stewart GR, Patel J, Robertson BD, Rae A, Young DB (2005)

Mycobacterial mutants with defective control of phagosomal acidification. PLoS Pathog 1: 269-278.

21. Van der Geize R, *et al*. (2007) A gene cluster encoding cholesterol catabolism in a soil actinomycete provides insight into *Mycobacterium tuberculosis* survival in macrophages. Proc Natl Acad Sci U S A 104: 1947-1952.

22. Raman S, Hazra R, Dascher CC, Husson RN (2004)

Transcription regulation by the *Mycobacterium tuberculosis* alternative sigma factor SigD and its role in virulence. J Bacteriol 186: 6605-6616.

23. Rengarajan J, Bloom BR, Rubin EJ (2005) Genome-wide requirements for *Mycobacterium tuberculosis* adaptation and survival in macrophages. Proc Natl Acad Sci U S A 102: 8327-8332.
